# Supplementary material for: Enhancing Healthcare Workforce Stability and Performance: Insights from a Cross-Sectional Relational Coordination Survey
Source: Preprints.org preprint supplement (doi:10.20944/preprints202403.0037.v1), 2024-03-01
Supplement: Supplementary file 1 [file supplementary]

**Table S1.** Relational coordination scores among healthcare professional groups by dimensions.

|  |  | Ratings of 1 | | | | | |
| --- | --- | --- | --- | --- | --- | --- | --- |
|  |  | GPs | Hospital physicians | Administrative personnel | Nurses | External | Overall |
| Frequency of communication | | | | | | | |
|  | GPs | 3,65 | 3,04 | 2,45 | 3,61 | 3,19 | 3,65 |
| Hospital physicians | 2,86 | 3,93 | 3,15 | 2,52 | 3,12 | 3,93 |
| Administrators | 2,14 | 2,36 | 3,07 | 2,21 | 2,45 | 3,07 |
| Nurses | 3,71 | 3,04 | 3,42 | 4,09 | 3,57 | 4,09 |
| Total | 3,28 | 3,41 | 3,14 | 3,28 | 3,28 | 3,85 |
| Total (weighted) | 3,05 | 3,55 | 3,09 | 2,90 | 3,15 | 3,92 |
| Timeliness of communication | | | | | | | |
|  | GPs | 4,28 | 2,68 | 2,98 | 4,11 | 3,51 | 4,28 |
| Hospital physicians | 2,98 | 3,91 | 3,12 | 3,26 | 3,32 | 3,91 |
| Administrators | 3,21 | 3,21 | 3,36 | 3,5 | 3,32 | 3,36 |
| Nurses | 3,12 | 2,93 | 3,7 | 4,32 | 3,52 | 4,32 |
| Total | 3,24 | 3,33 | 3,32 | 3,80 | 3,42 | 3,98 |
| Total (weighted) | 3,20 | 3,53 | 3,21 | 3,56 | 3,38 | 4,11 |
| Accuracy of communication | | | | | | | |
|  | GPs | 4,05 | 3,65 | 3,1 | 3,9 | 3,67 | 4,05 |
| Hospital physicians | 3,02 | 3,85 | 3,09 | 3,45 | 3,35 | 3,85 |
| Administrators | 3,93 | 3,64 | 3,43 | 3,50 | 3,63 | 3,43 |
| Nurses | 3,27 | 3,34 | 3,77 | 4,26 | 3,66 | 4,26 |
| Total | 3,30 | 3,62 | 3,36 | 3,83 | 3,53 | 3,91 |
| Total (weighted) | 3,27 | 3,73 | 3,22 | 3,64 | 3,47 | 4,03 |
| Problem-solving communication | | | | | | | |
| Ratings by 1 | GPs | 4,27 | 3,51 | 3,06 | 4,21 | 3,76 | 4,27 |
| Hospital physicians | 3,52 | 3,90 | 3,22 | 3,70 | 3,58 | 3,9 |
| Administrators | 3,43 | 3,43 | 3,29 | 3,43 | 3,39 | 3,29 |
| Nurses | 3,44 | 3,41 | 3,70 | 4,20 | 3,69 | 4,20 |
| Total | 3,60 | 3,64 | 3,38 | 3,96 | 3,65 | 3,95 |
| Total (weighted) | 3,61 | 3,73 | 3,28 | 3,83 | 3,61 | 4,05 |
| Shared goals | | | | | | | |
|  | GPs | 4,09 | 3,30 | 2,61 | 4,02 | 3,55 | 4,09 |
| Hospital physicians | 3,18 | 3,81 | 2,84 | 3,36 | 3,40 | 3,81 |
| Administrators | 2,86 | 3,29 | 3,07 | 3,14 | 3,29 | 3,07 |
| Nurses | 3,40 | 3,23 | 3,32 | 4,2 | 3,55 | 4,20 |
| Total | 3,40 | 3,50 | 2,99 | 3,78 | 3,48 | 3,86 |
| Total (weighted) | 3,32 | 3,61 | 2,90 | 3,57 | 3,44 | 3,98 |
| Shared knowledge | | | | | | | |
|  | GPs | 4,40 | 3,45 | 2,89 | 3,66 | 3,60 | 4,40 |
| Hospital physicians | 3,27 | 3,83 | 2,94 | 3,13 | 3,29 | 3,83 |
| Administrators | 2,50 | 2,50 | 2,71 | 2,43 | 2,54 | 2,71 |
| Nurses | 3,38 | 3,30 | 3,17 | 4,28 | 3,53 | 4,28 |
| Total | 3,47 | 3,54 | 3,01 | 3,63 | 3,41 | 3,9 |
| Total (weighted) | 3,39 | 3,59 | 2,95 | 3,33 | 3,32 | 4,06 |
| Mutual respect | | | | | | | |
|  | GPs | 4,46 | 3,44 | 3,39 | 4,24 | 3,88 | 4,46 |
| Hospital physicians | 3,94 | 4,17 | 3,73 | 4,05 | 3,97 | 4,17 |
| Administrators | 3,71 | 3,93 | 3,64 | 3,93 | 3,8 | 3,64 |
| Nurses | 3,79 | 3,63 | 3,98 | 4,42 | 3,96 | 4,42 |
| Total | 3,96 | 3,85 | 3,77 | 4,22 | 3,95 | 3,92 |
| Total (weighted) | 3,97 | 3,97 | 3,71 | 4,13 | 3,94 | 4,11 |

1 Relational coordination within workgroups scoring: weak < 4.1, moderate 4.1–4.6, strong > 4.6; between workgroup scoring: weak < 3.5, moderate 3.5–4.0, strong > 4.0 [19]. Abbreviations: GPs, General Practitioners.

**Table S2.** Correlations between demographic, professional, and feedback factors with relational coordination scores.

| RC | Age1 | Years in service1 | GPs' compliance with referral criteria1 | GPs receiving referral feedback1 | Hospital physicians' perception of inappropriate referral priority1 | Hospital physicians giving feedback on inappropriate referrals1 | Hospital physicians' rating of the quality of clinical questions posed by GPs1 |
| --- | --- | --- | --- | --- | --- | --- | --- |
| Overall | n.s. | n.s. | n.s. | n.s. | 0,255*** | n.s. | -0,306*** |
| Within group | n.s. | n.s. | -0,238** | n.s. | n.s. | n.s. | n.s. |
| Between groups | n.s. | n.s. | n.s. | n.s. | -0,244*** | n.s. | -0,324*** |
| GPs | n.s. | n.s. | -0,238*** | n.s. | -0,270*** | n.s. | -0,389*** |
| Hospital physicians | n.s. | n.s. | n.s. | n.s. | n.s. | n.s. | n.s. |
| Administrators | n.s. | n.s. | n.s. | n.s. | -0,185*** | n.s. | -0,188*** |
| Nurses | n.s. | n.s. | n.s. | n.s. | -0,140** | n.s. | -0,176** |
| Frequency of communication | 0,116** | n.s. | n.s. | n.s. | -0,134* | -0,126* | n.s. |
| Timeliness of communication | n.s. | n.s. | n.s. | n.s. | -0,150** | n.s. | -0,288*** |
| Accuracy of information | n.s. | n.s. | n.s. | n.s. | -0,200*** | n.s. | -0,297*** |
| Problem-solving communication | n.s. | n.s. | n.s. | n.s. | -0,229*** | n.s. | -0,234*** |
| Shared goal | n.s. | n.s. | n.s. | n.s. | -0,228*** | n.s. | -0,272*** |
| Shared knowledge | n.s. | n.s. | -0,191* | n.s. | -0,108* | n.s. | n.s. |
| Mutual respect | n.s. | n.s. | n.s. | n.s. | -0,193*** | n.s. | -0,244*** |

1Spearman correlation coefficients were utilized to determine the significance of relationships between various demographic characteristics, professional factors, and feedback practices and relational coordination (RC) scores. Significance levels are denoted by asterisks, where * p < 0.05, ** p < 0.01, and *** p < 0.001. The RC scores are divided into internal coordination (RC within group), external coordination (RC between groups), and specific professional groups: general practitioners (GP), hospital physicians, administrative personnel, and nurses. Additional dimensions of RC are included: frequency, timeliness and accuracy of information, problem-solving communication, shared goals, shared knowledge, and mutual respect. Negative correlations suggest that higher values in the demographic or professional factor are associated with lower perceived RC, while positive correlations suggest higher RC. Additional abbreviatons: n.s., not significant; n.d., no data.
